# Supplementary material
Source: publisher site journal article supplement (https://www.dovepress.com/article/480358)
Supplement: Supplementary file 1 [file get_supplementary_file.php]

**Deciphering the Prognostic and Therapeutic Value of a Gene Model Associated with Two Aggressive Hepatocellular Carcinoma Phenotypes Using Machine Learning**

Junhan Pan1*, Cong Zhang1, 2, 3*, Huizhen Huang1, Yanyan Zhu1, Yuhao Zhang4, Shuzhen Wu1, Yan-Ci Zhao1, Feng Chen1

1. Department of Radiology, The First Affiliated Hospital, Zhejiang University School of Medicine, Hangzhou, China
2. Hepatobiliary and Pancreatic Interventional Treatment Center, Division of Hepatobiliary and Pancreatic Surgery, The First Affiliated Hospital, Zhejiang University School of Medicine, Hangzhou, China.
3. Zhejiang Provincial Key Laboratory of Pancreatic Disease, The First Affiliated Hospital, Zhejiang University School of Medicine, Hangzhou, China
4. Department of Pathology, The First Affiliated Hospital, Zhejiang University School of Medicine, Hangzhou, China

*These authors contributed equally to this work.

Corresponding author: Feng Chen, Email: chenfenghz@zju.edu.cn.


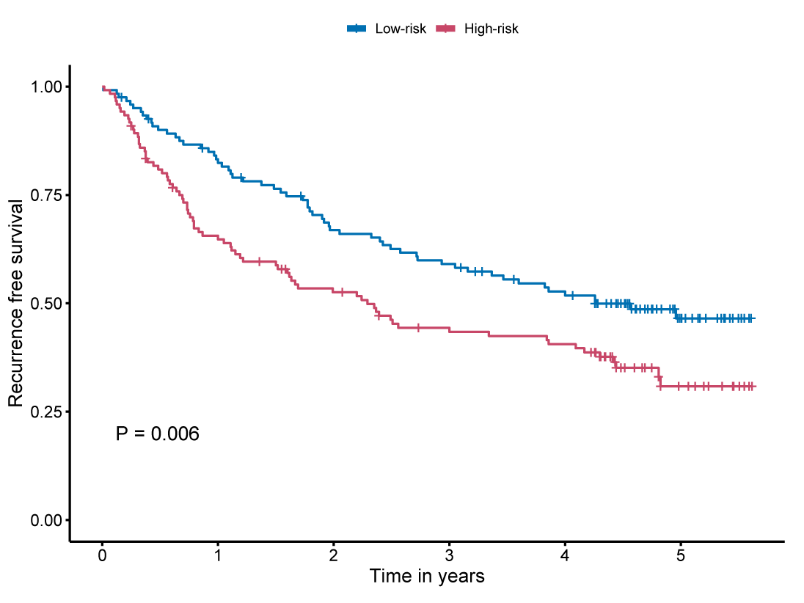


**Figure S1** Comparison of recurrence free survivalbetween low-risk and high-risk patient groups in GSE14520 cohort.


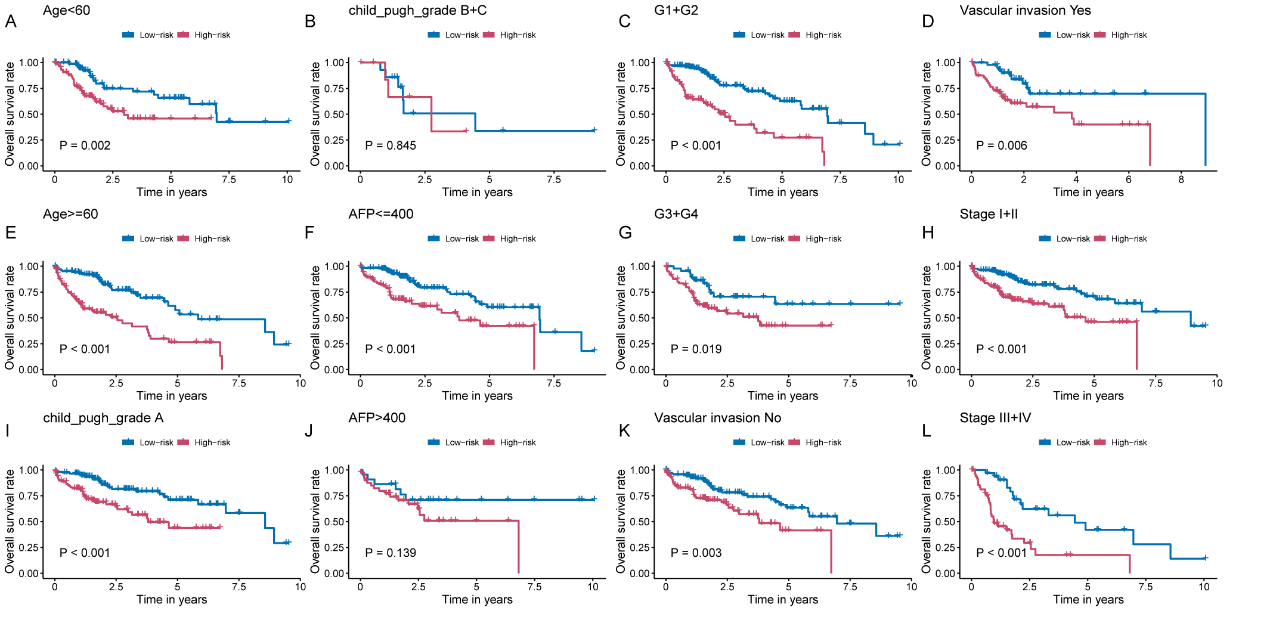
**Figure S2** Comparison of overall survival between low-risk and high-risk patient groups in the TCGA cohort, stratified by **(A, E)** age, **(B, I)** child-pugh grade, **(C, G)** tumor grade, **(D, K)** vascular invasion, **(F, J)** alpha-fetoprotein, and **(H, L)** clinical stage.


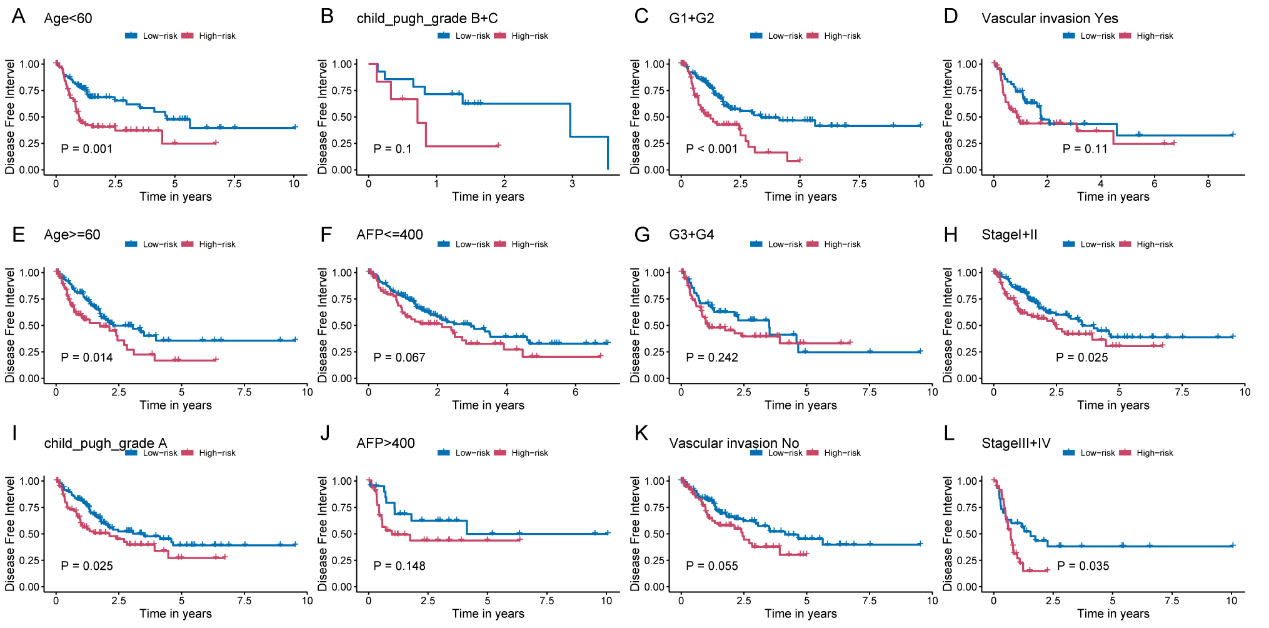
**Figure S3** Comparison of disease-free interval between low-risk and high-risk patient groups in the TCGA cohort, stratified by **(A, E)** age, **(B, I)** child-pugh grade, **(C, G)** tumor grade, **(D, K)** vascular invasion, **(F, J)** alpha-fetoprotein, and **(H, L)** clinical stage.


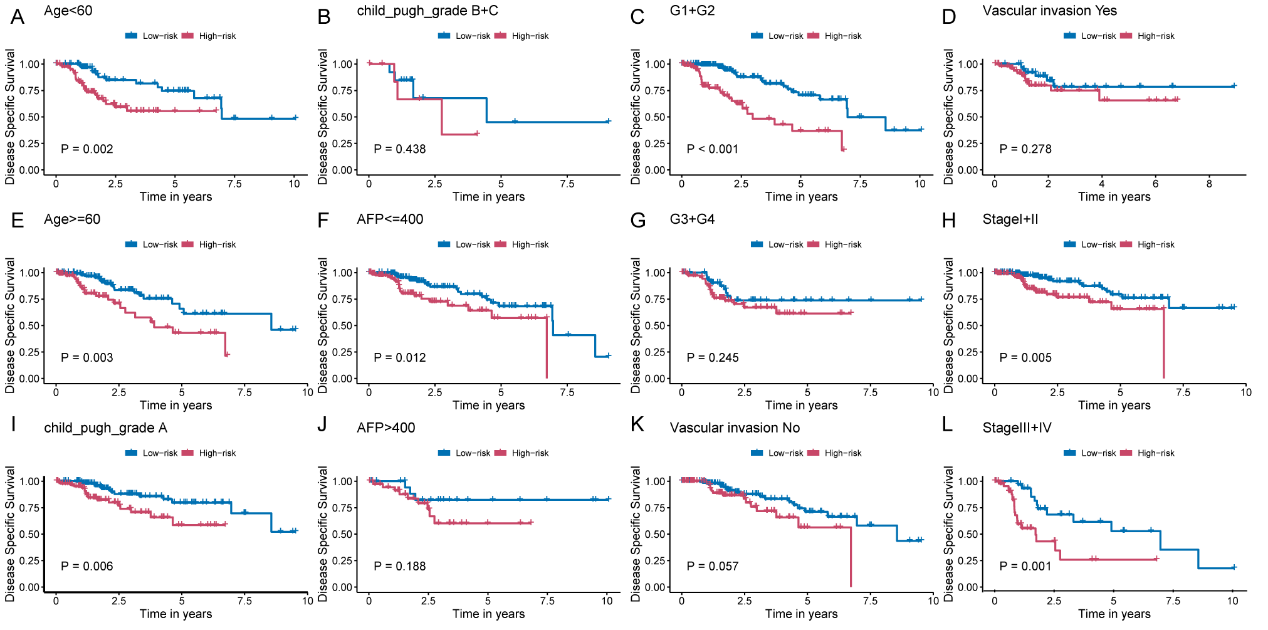


**Figure S4** Comparison of disease-specific survival between low-risk and high-risk patient groups in the TCGA cohort, stratified by **(A, E)** age, **(B, I)** child-pugh grade, **(C, G)** tumor grade, **(D, K)** vascular invasion, **(F, J)** alpha-fetoprotein, and **(H, L)** clinical stage.


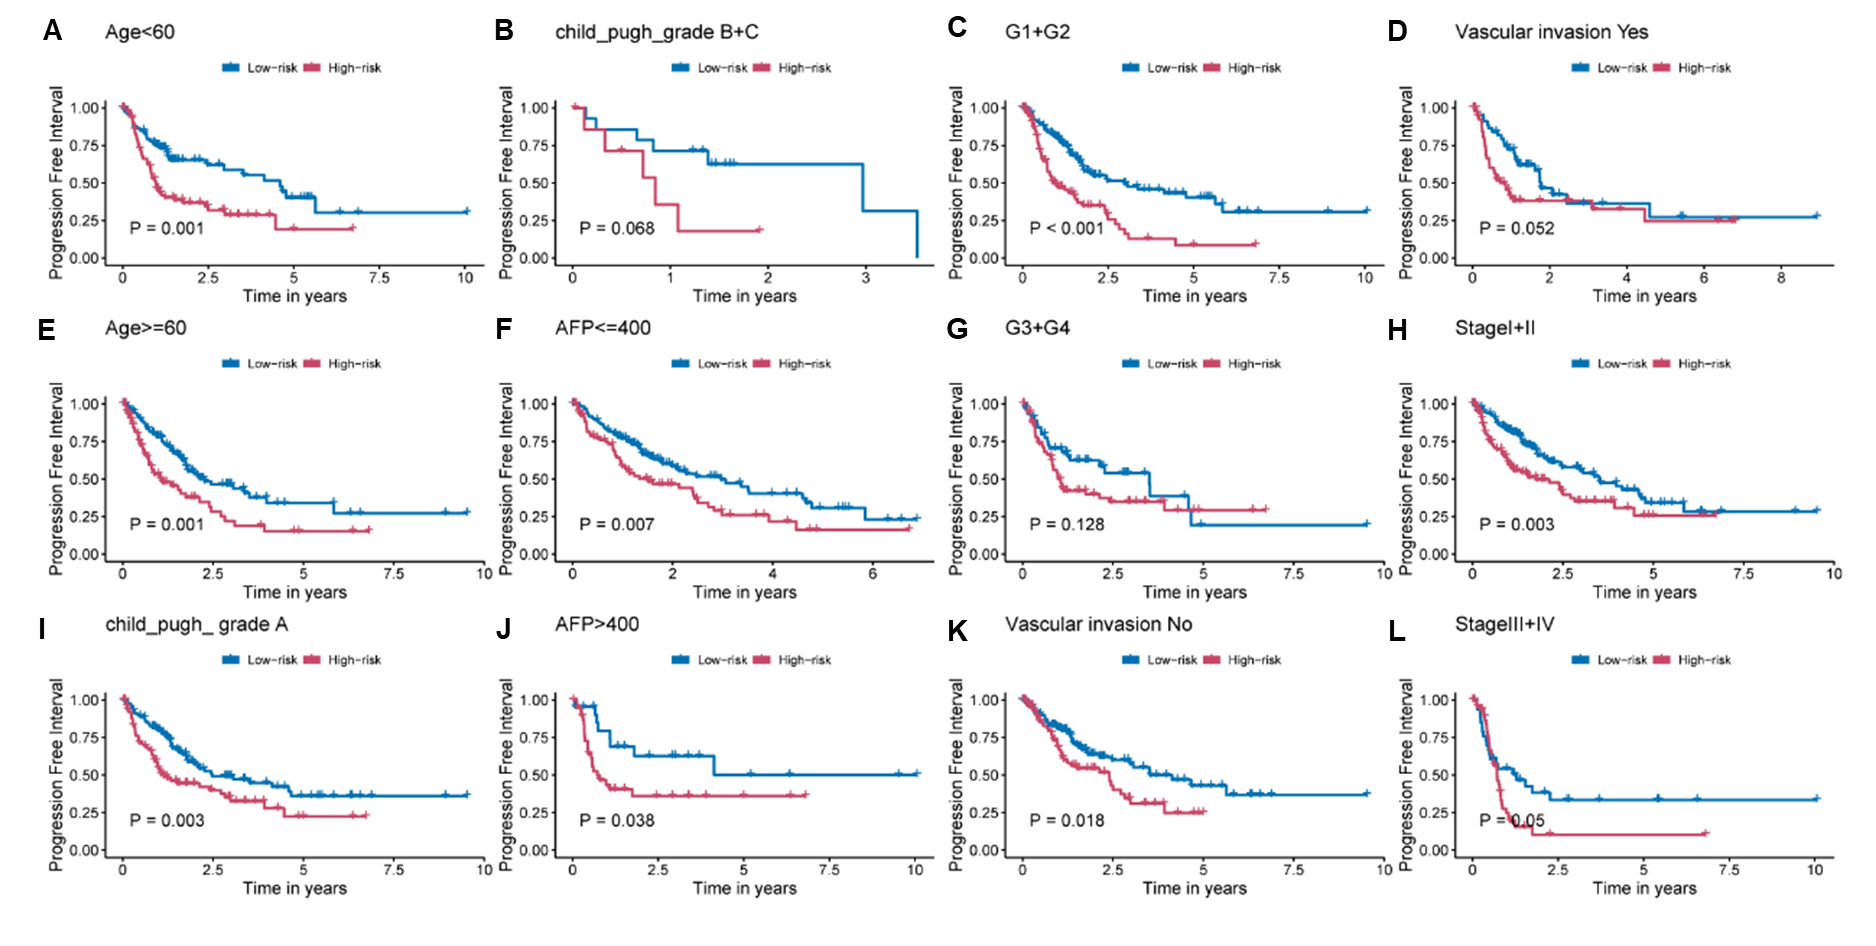


**Figure S5** Comparison of progression-free interval between low-risk and high-risk patient group in the TCGA cohort, stratified by **(A, E)** age, **(B, I)** child-pugh grade, **(C, G)** tumor grade, **(D, K)** vascular invasion, **(F, J)** alpha-fetoprotein, and **(H, L)** clinical stage.


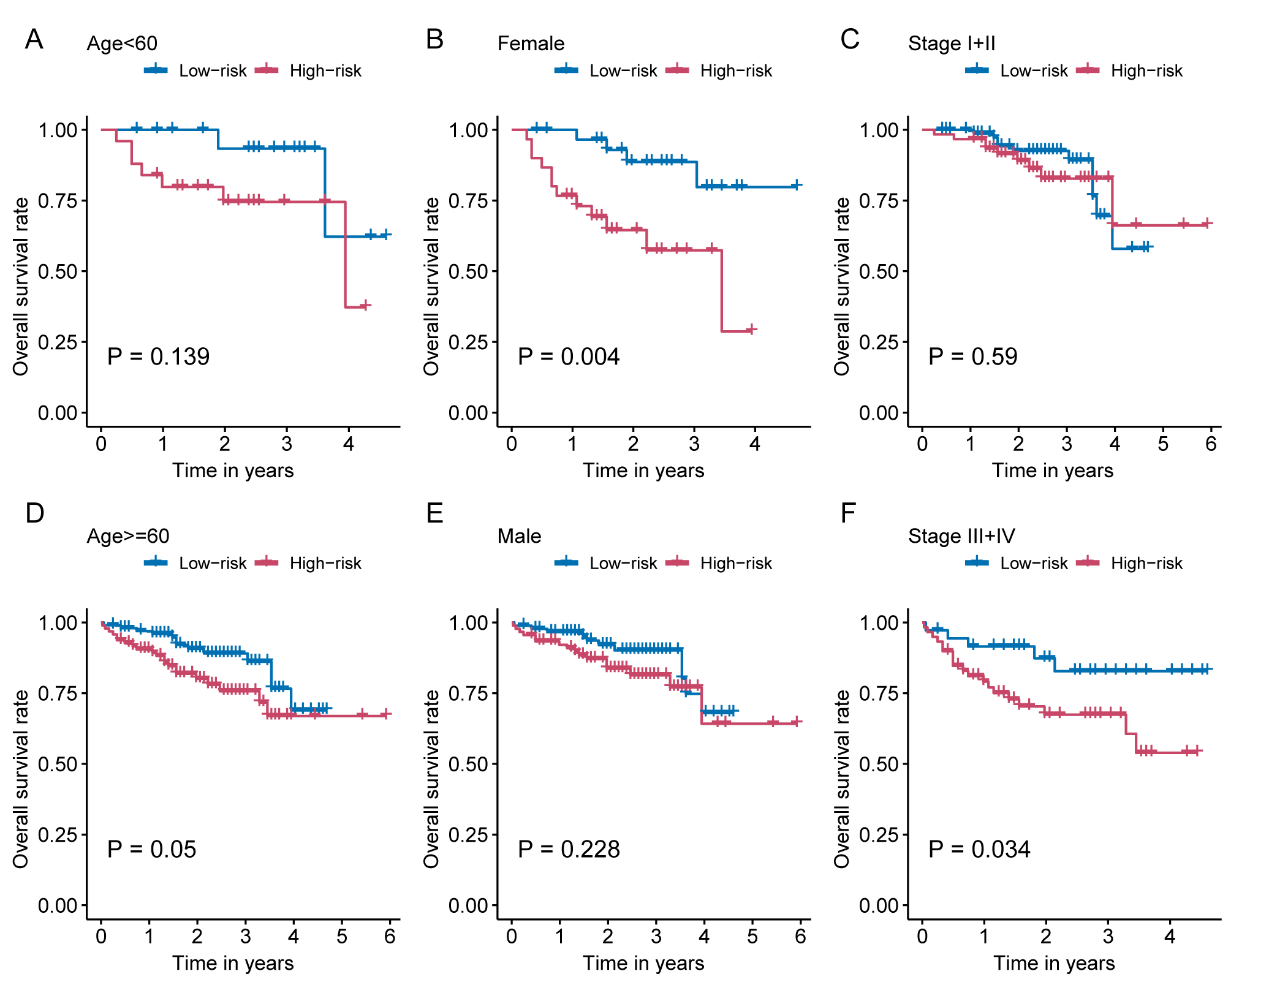


**Figure S6** Comparison of overall survival between low-risk and high-risk patient groups in the ICGC-LIRI-JP cohort, stratified by **(A, D)** age, **(B, E)** gender, and **(C, F)** clinical stage.


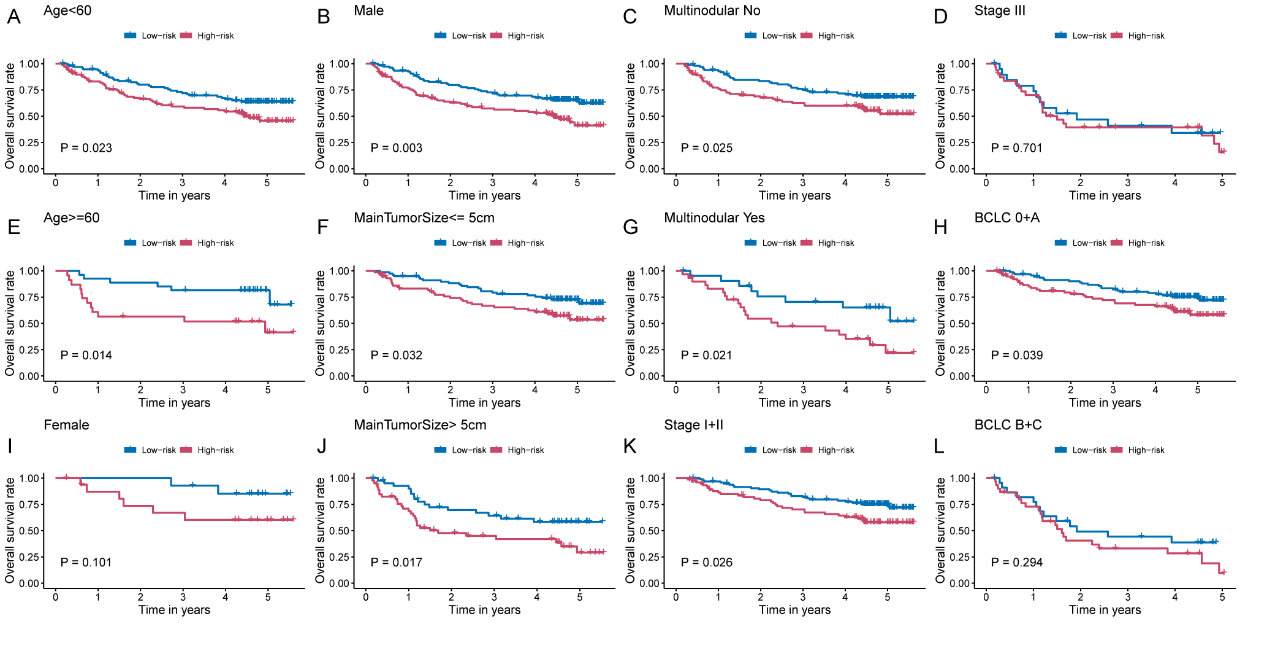


**Figure S7** Comparison of overall survival between low-risk and high-risk patient groups in the TCGA cohort, stratified by **(A, E)** age, **(B, I)** gender, **(C, G)** multinodular, **(D, K)** clinical stage, **(F, J)** main tumor size, and **(H, L)** BCLC staging.


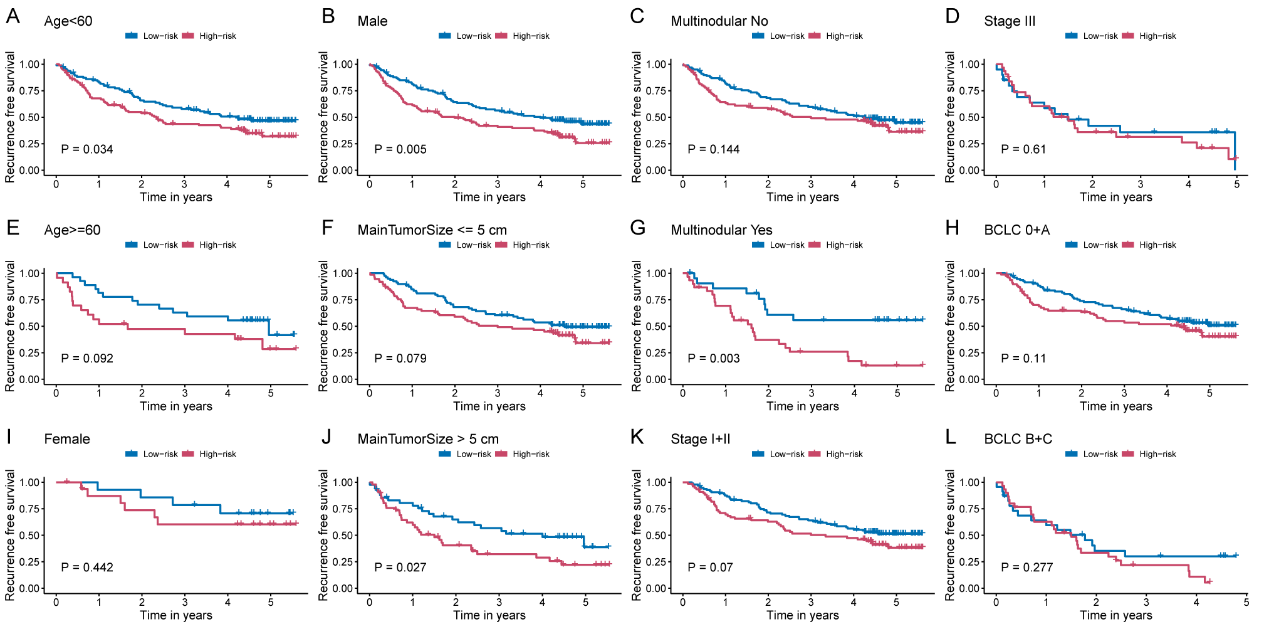


**Figure S8** Comparison of recurrence-free survival between low-risk and high-risk patient groups, stratified by **(A, E)** age, **(B, I)** gender, **(C, G)** multinodular, **(D, K)** clinical stage, **(F, J)** main tumor size, and **(H, L)** BCLC staging.

| **Table S1** Sample sizes of the six cohorts included in this study | |
| --- | --- |
| **Cohort name** | **Number of patients** |
| TCGA-LIHC cohort | 363 |
| ICGC-LIRI-JP cohort | 240 |
| GSE14520 cohort | 242 |
| GSE104580 cohort | 147 |
| GSE109211 cohort | 67 |
| FAHZU In-house cohort | 25 |

| **Table S2** Summary of coefficients, HR, 95% CI, and P value for model genes | | | |
| --- | --- | --- | --- |
| **Gene name** | **Coefficient** | **Hazard ratio (95% CI)** | ***P*-value** |
| SLC41A3 | 0.46 | 1.6 (1.1-2.2) | 0.006 |
| FNDC4 | 0.21 | 1.2 (1.1-1.4) | 0.002 |
| NDRG1 | 0.11 | 1.1 (0.96-1.3) | 0.140 |
| NOP56 | 0.31 | 1.4 (1-1.8) | 0.025 |

| **Table** **S3** Univariate and multivariate Cox analysis of overall survival in the TCGA-LIHC cohort | | | | | |
| --- | --- | --- | --- | --- | --- |
| **Variables** | **Univariate analysis** | |  | **Multivariate analysis** | |
| **HR (95% CI)** | ***P*-value** |  | **HR (95% CI)** | ***P*-value** |
| Age (≥60 years vs. <60 years) | 1.21 (0.86, 1.72) | 0.281 |  | / | / |
| Child-Pugh grade (B-C vs. A) | 1.62 (0.80, 3.28) | 0.183 |  | / | / |
| AFP (>400 ng/ml vs. ≤400 ng/ml) | 1.06 (0.65, 1.73) | 0.832 |  | / | / |
| Grade (G3-G4 vs. G1-G2) | 1.12 (0.78, 1.61) | 0.540 |  | / | / |
| Vascular invasion (Yes vs. No) | 1.35 (0.89, 2.05) | 0.162 |  | / | / |
| Stage (Stage III-IV vs. Stage I-II) | 2.49 (1.71-3.61) | < 0.001 |  | 2.43 (1.67, 3.54) | < 0.001 |
| Risk group (High vs. Low) | 3.00 (2.06-4.37) | < 0.001 |  | 2.94 (1.97, 4.38) | < 0.001 |
| **Abbreviations:** AFP, Alpha-fetoprotein. | | | | | |

| **Table** **S4** Univariate and multivariate Cox analysis of overall survival in the GSE14520 cohort | | | | | |
| --- | --- | --- | --- | --- | --- |
| **Variables** | **Univariate analysis** | |  | **Multivariate analysis** | |
| **HR (95% CI)** | ***P*-value** |  | **HR (95% CI)** | ***P*-value** |
| Gender (Male vs. Female) | 1.86 (0.90, 3.83) | 0.093 |  | / | / |
| Age (≥60 years vs. <60 years) | 0.84 (0.50, 1.41) | 0.512 |  | / | / |
| Main tumor size (>5cm vs. ≤5cm) | 1.96 (1.31, 2.93) | 0.001 |  | 1.04 (0.59, 1.84) | 0.893 |
| Multinodular (Yes vs. No) | 1.65 (1.06, 2.93) | 0.025 |  | 0.50 (0.27, 0.94) | 0.032 |
| Stage (Stage III vs. Stage I-II) | 3.64 (2.34, 5.65) | < 0.001 |  | 1.83 (0.87, 3.82) | 0.110 |
| BCLC staging (B-C vs. 0-A) | 3.69 (2.38, 5.73) | < 0.001 |  | 3.47 (1.60, 7.51) | 0.002 |
| Risk group (High vs. Low) | 1.94 (1.29, 2.92) | 0.002 |  | 1.64 (1.06, 2.55) | 0.027 |
| **Abbreviations:** BCLC, Barcelona Clinic Liver Cancer. | | | | | |

| **Table** **S5** Univariate and multivariate Cox analysis of overall survival in the ICGC-LIRI-JP cohort | | | | | |
| --- | --- | --- | --- | --- | --- |
| **Variables** | **Univariate analysis** | |  | **Multivariate analysis** | |
| **HR (95% CI)** | ***P*-value** |  | **HR (95% CI)** | ***P*-value** |
| Age (≥ 60 years vs. <60 years) | 0.87 (0.42, 1.81) | 0.711 |  | / | / |
| Gender (Male vs. Female) | 0.49 (0.26, 0.91) | 0.023 |  | 0.38 (0.20, 0.72) | 0.003 |
| Stage (Stage III-IV vs. Stage I-II) | 2.26 (1.23, 4.12) | 0.008 |  | 2.45 (1.31, 4.58) | 0.005 |
| Risk group (High vs. Low) | 2.18 (1.16, 4.09) | 0.015 |  | 2.03 (1.07, 3.86) | 0.029 |

| **Table** **S6** Comparison of clinical and pathological characteristics between the high-risk and low-risk groups in the in-house cohort | | | |
| --- | --- | --- | --- |
| **Characteristics** | **High-risk group**  **(n=12)** | **Low-risk group**  **(n=13)** | ***P*-value** |
| ***Clinical characteristics*** | | | |
| Age (years) | 60 (41-77) | 63 (37-81) | 0.413 ***** |
| Gender |  |  | 0.220 |
| Male | 10 (83.3 %) | 13 (100 %) |  |
| Female | 2 (16.7 %) | 0 (0 %) |  |
| Hepatitis B virus infection |  |  | 0.645 |
| Presence | 10 (83.3 %) | 9 (69.2 %) |  |
| Absent | 2 (16.7 %) | 4 (30.8 %) |  |
| Child-Pugh class |  |  | >0.999 |
| A | 10 (83.3 %) | 11 (84.6 %) |  |
| B | 2 (16.7 %) | 2 (15.4 %) |  |
| BCLC stage |  |  | 0.593 |
| 0-A | 10 (83.3 %) | 12 (92.3 %) |  |
| B-C | 2 (16.7 %) | 1 (7.7 %) |  |
| Serum AFP (ng/ml) |  |  | < 0.001 |
| ≤ 400 | 3 (25 %) | 12 (92.3 %) |  |
| > 400 | 9 (75 %) | 1 (7.7 %) |  |
| ***Pathological characteristics*** | |  |  |
| Edmondson grade |  |  | 0.066 **#** |
| I-II | 3 (25%) | 8 (61.5%) |  |
| III-IV | 9 (75%) | 5 (38.5%) |  |
| Cirrhosis |  |  | 0.320 **#** |
| Presence | 7 (58.3%) | 5 (38.5%) |  |
| Absent | 5 (41.7%) | 8 (61.5%) |  |
| Fibrosis capsule |  |  | *0.561* **#** |
| Presence | 6 (50%) | 8 (61.5%) |  |
| Absent | 6 (50%) | 5 (38.5%) |  |
| Microvascular invasion |  |  | 0.041 |
| Presence | 10 (83.3%) | 5 (38.5%) |  |
| Absent | 2 (16.7%) | 8 (61.5%) |  |
| Satellite nodule |  |  | >0.999 |
| Presence | 2 (16.7%) | 3 (23.1%) |  |
| Absent | 10 (83.3%) | 10 (76.9%) |  |
| **Notes: ****P*-values are from the U test for continuous variables, **#***P*-values from X2 test, and other *P*-values from the Fisher's exact test for categorical variables.  **Abbreviations:** BCLC, Barcelona Clinic Liver Cancer; AFP, Alpha-fetoprotein. | | | |

| **Table** **S7** Comparison of imaging features between the high-risk and low-risk groups in the in-house cohort | | | |
| --- | --- | --- | --- |
| **Characteristics** | **High-risk group**  **(n=12)** | **Low-risk group**  **(n=13)** | ***P-*value** |
| Lesion size >5.0 cm |  |  | 0.165**#** |
| Presence | 7 (58.3%) | 4 (30.8%) |  |
| Absent | 5 (41.7%) | 9 (69.2%) |  |
| Multifocal lesions |  |  | 0.593 |
| Presence | 2 (16.7%) | 1 (7.7%) |  |
| Absent | 10 (83.3%) | 12 (92.3%) |  |
| Nonsmooth tumor margin |  |  | 0.041 |
| Presence | 10 (83.3%) | 5 (38.5%) |  |
| Absent | 2 (16.7%) | 8 (61.5%) |  |
| Rim arterial phase hyperenhancement |  |  | 0.428 |
| Presence | 6 (50.0%) | 4 (30.8%) |  |
| Absent | 6 (50.0%) | 9 (69.2%) |  |
| Intratumoral artery |  |  | 0.202 |
| Presence | 10 (83.3%) | 7 (53.8%) |  |
| Absent | 2 (16.7%) | 6 (46.2%) |  |
| Corona enhancement |  |  | <0.001**#** |
| Presence | 10 (83.3%) | 2 (15.4%) |  |
| Absent | 2 (16.7%) | 11 (84.6%) |  |
| Mosaic architecture |  |  | 0.028 **#** |
| Presence | 8 (66.7%) | 3 (23.1%) |  |
| Absent | 4 (33.3%) | 10 (76.9%) |  |
| Incomplete “capsule” appearance |  |  | >0.999 |
| Presence | 10 (83.3%) | 11 (84.6%) |  |
| Absent | 2 (16.7%) | 2 (15.4%) |  |
| Necrosis or serve ischemia |  |  | 0.073 |
| Presence | 11 (91.7%) | 7 (53.8%) |  |
| Absent | 1 (8.3%) | 6 (46.2%) |  |
| Marked diffusion restriction |  |  | 0.688 |
| Presence | 8 (66.7%) | 7 (53.8%) |  |
| Absent | 4 (33.3%) | 6 (46.2%) |  |
| **Notes:** **#***P*-values from X2 test, and other *P*-values from the Fisher's exact test for categorical variables. | | | |
